# Supplementary material
Source: Copernicus journal article supplement (doi:10.5194/egusphere-2026-1218)
Supplement: Supplementary file 1 [file egusphere-2026-1218-supplement.pdf]

*S1 Supplementary Figures*

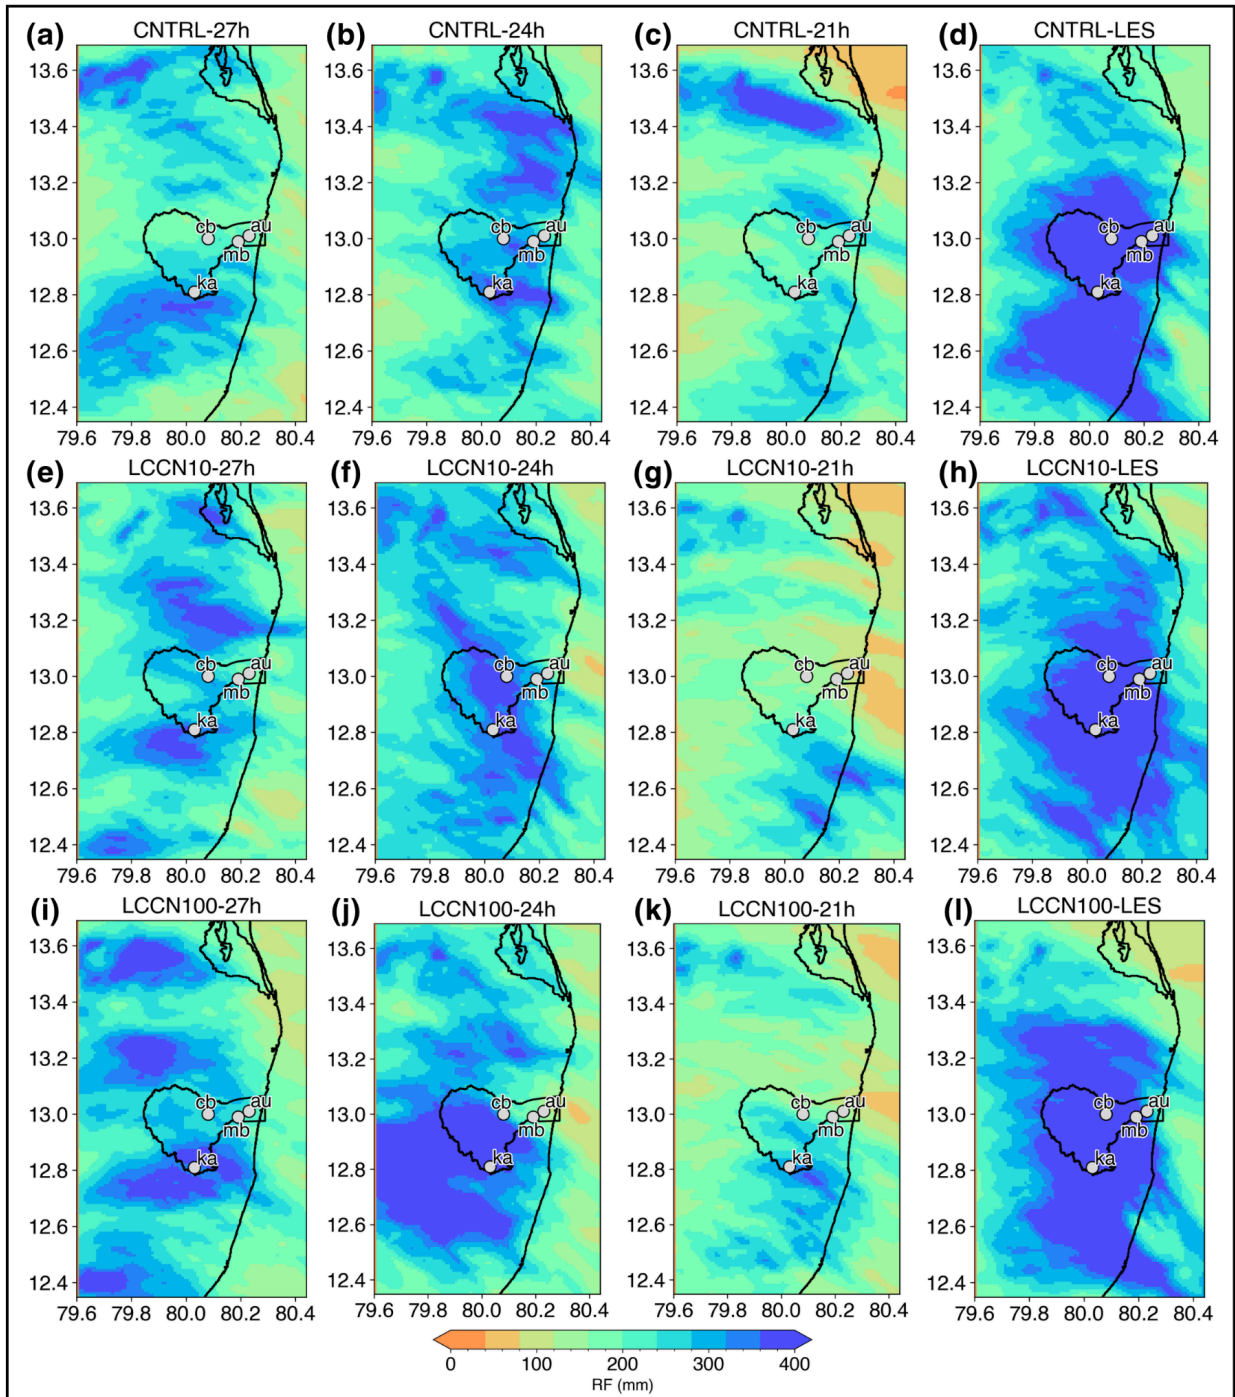

**Fig. S1.** Spatial distribution of accumulated rainfall for all sensitivity experiments: CNTRL(a-d), LCCN10 (e-h), and LCCN100 (i-l) experiments

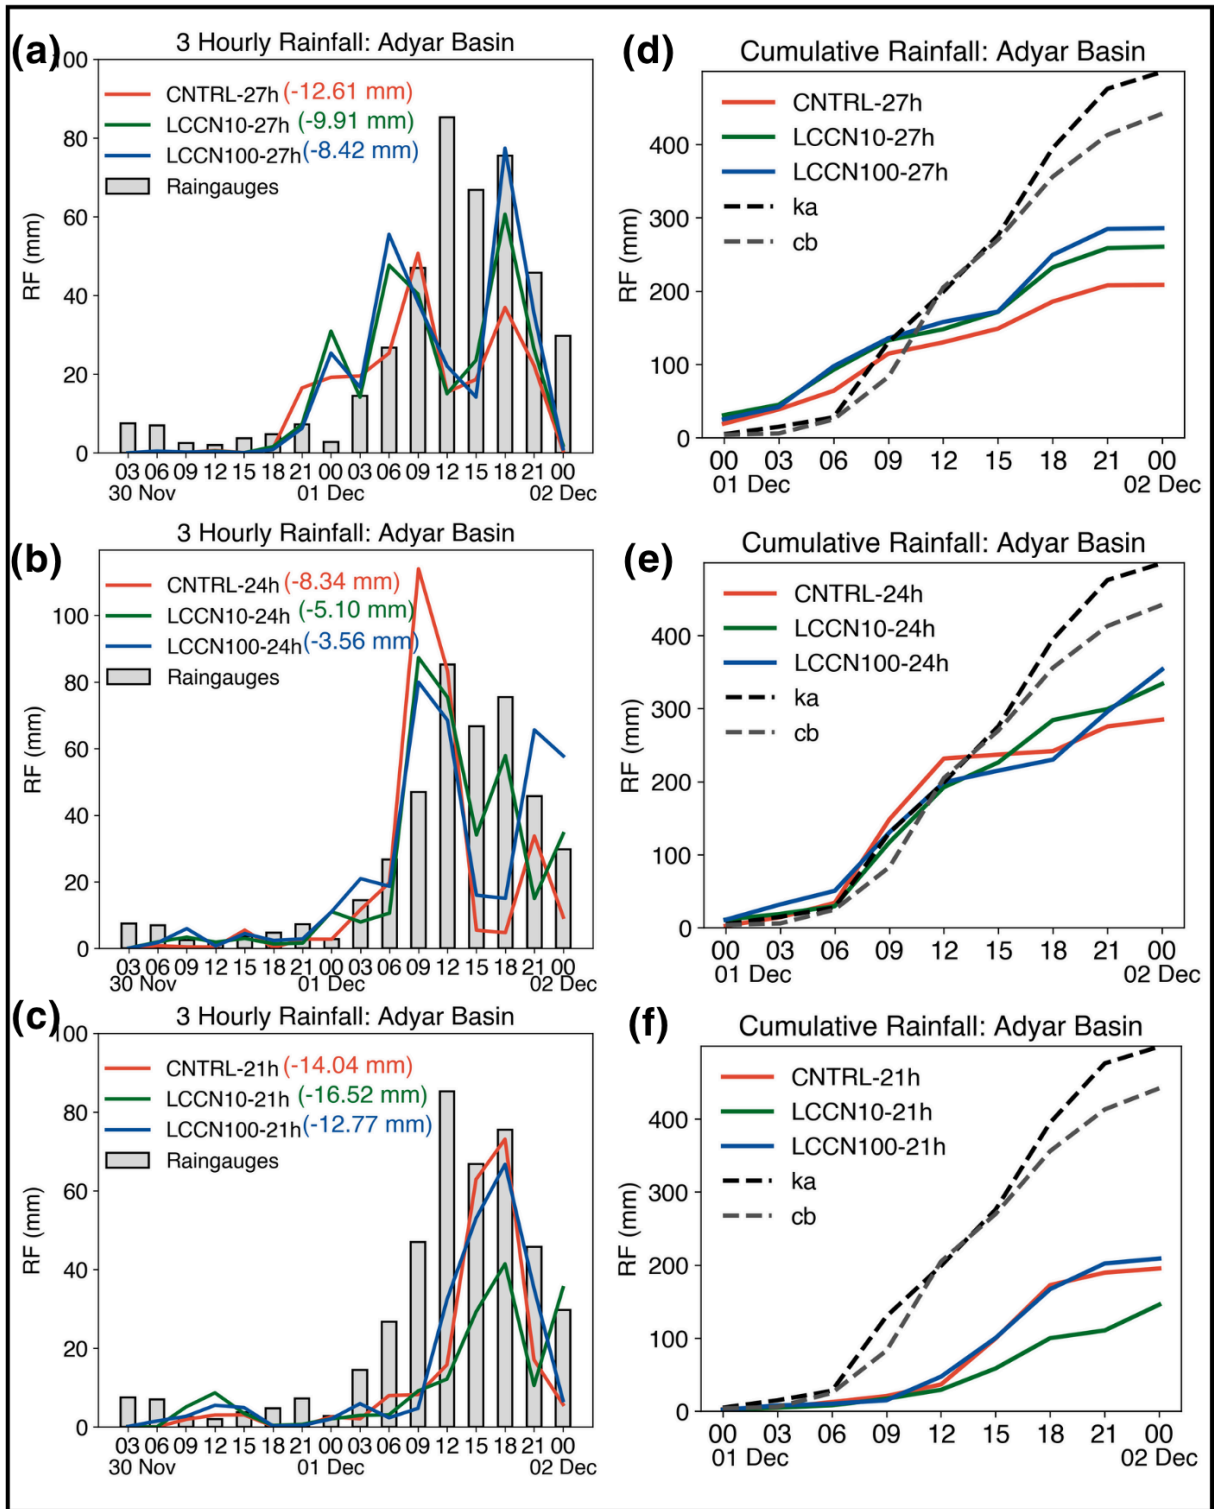

**Fig. S2.** Left panels show 3-hourly accumulated rainfall with mean biases (mm) over the Adyar basin for sensitivity experiments at lead times of (a) 27 hours, (b) 24 hours, and (c) 21 hours, evaluated against raingauge observations at the basin. Right panels show the corresponding basin-averaged cumulative rainfall for (d) 27 hours, (e) 24 hours, and (f) 21 hours

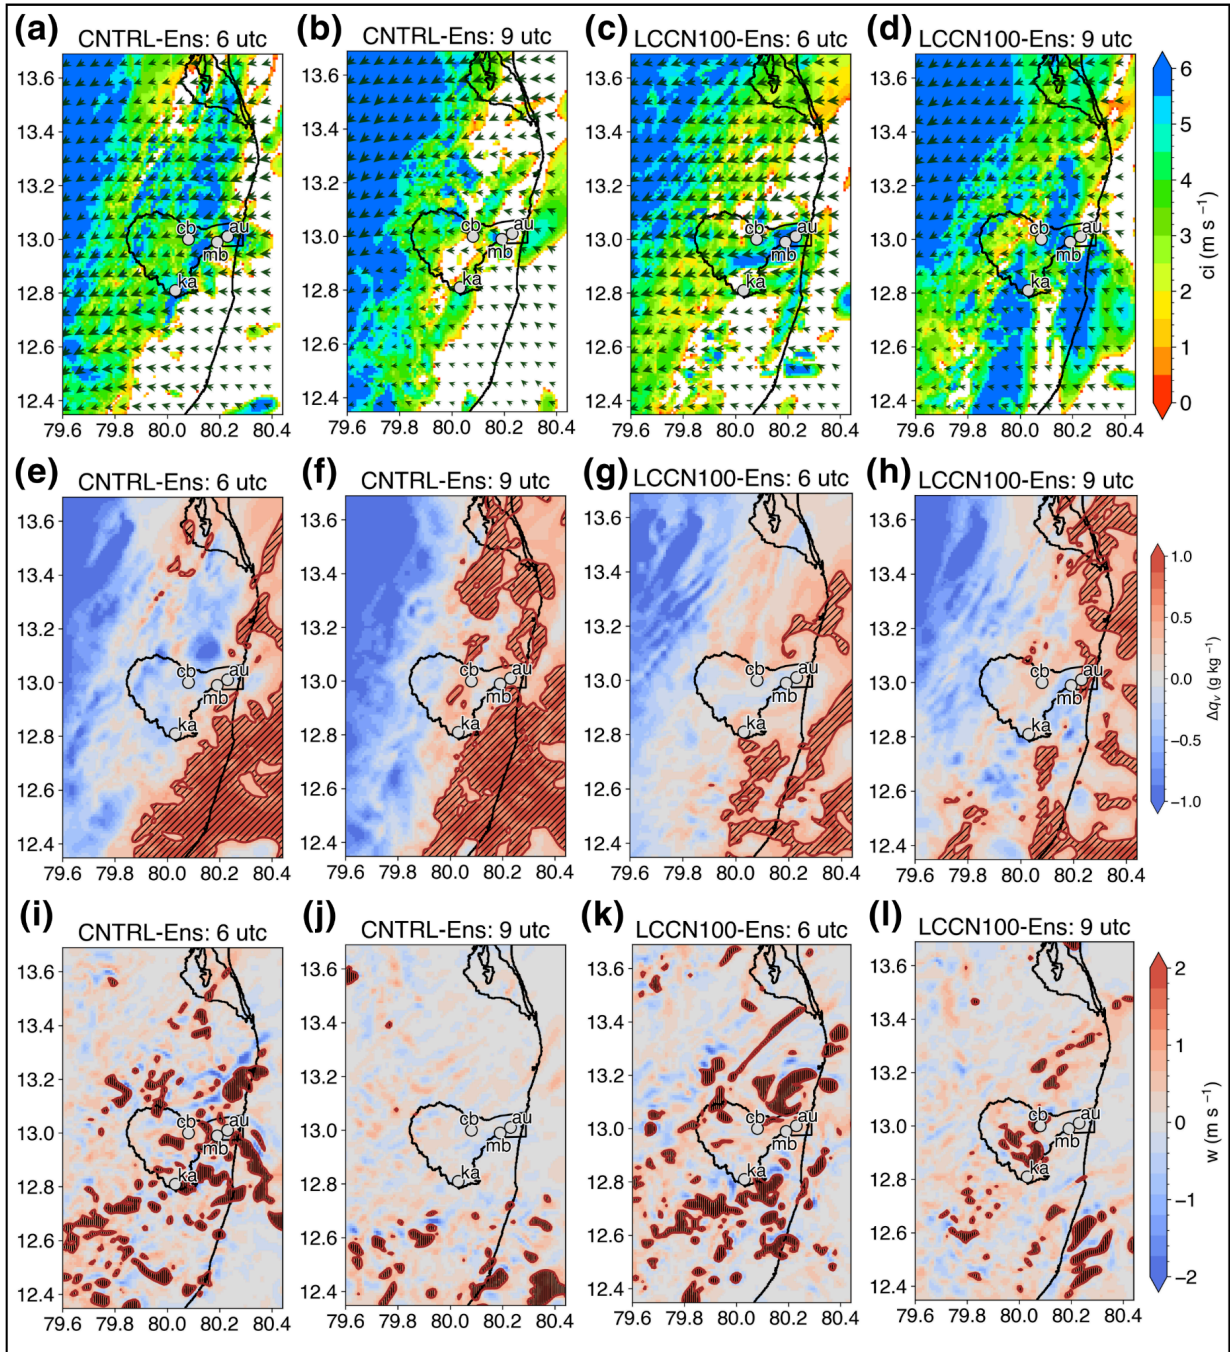

**Fig. S3.** The spatial distribution of cold pool intensity (a-d), moisture patch (e-h) and convective updraft (red) cores (i-r) at 650 hpa at 6 UTC and 9 UTC on 1 December for CNTRL-Ens and LCCN100-Ens

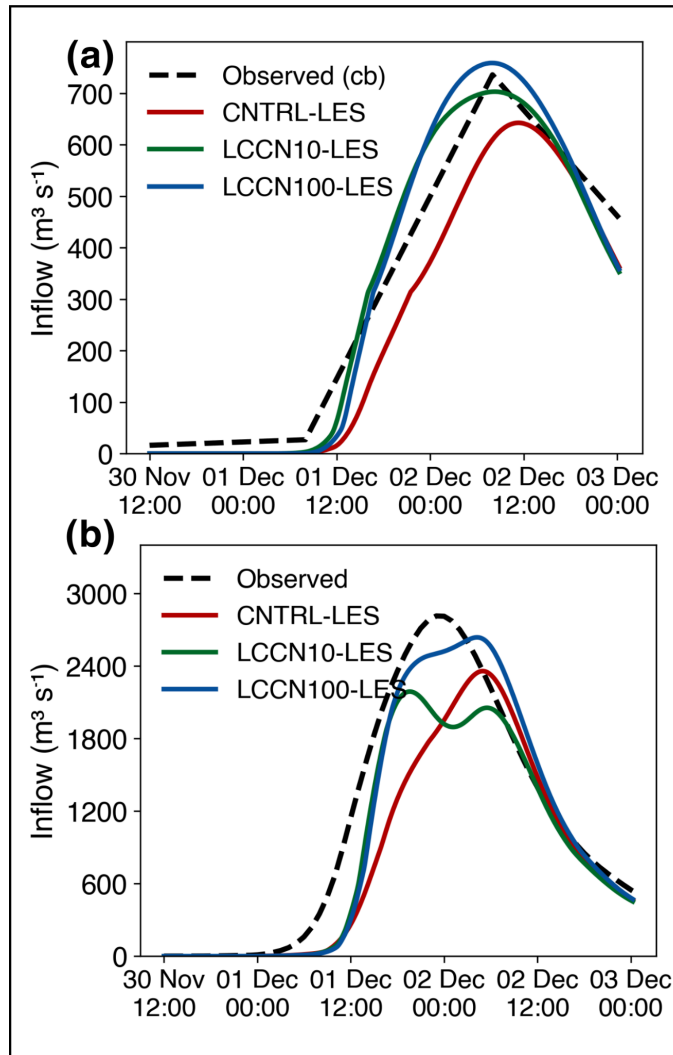

**Fig. S4.** The comparison of IMERG derived observed peak inflows with simulated peak inflows from CNTRL-LES, LCCN10-LES, and LCCN100-LES into (a) cb reservoir and (b) Chennai city

*S2 Supplementary Tables*

| <b>Inner Domain</b> | <b>Aerosol (CCN) Experiments</b>                          | <b>Model Initialization, (domains)</b>       | <b>Sensitivity Experiments</b>           | <b>Ensemble (1 km)</b>                   |
|---------------------|-----------------------------------------------------------|----------------------------------------------|------------------------------------------|------------------------------------------|
| 1km (d4)            | CNTRL(baseline),<br>LCCN10-CNTRL/10,<br>LCCN100-CNTRL/100 | 28 Nov, 21 UTC (d1-d4)<br>Lead time: 27 hrs  | CNTRL-27h,<br>LCCN10-27h,<br>LCCN100-27h | CNTRL-Ens,<br>LCCN10-Ens,<br>LCCN100-Ens |
|                     |                                                           | 29 Nov, 00 UTC (d1-d4)<br>Lead time: 24 hrs  | CNTRL-24h,<br>LCCN10-24h,<br>LCCN100-24h |                                          |
|                     |                                                           | 29 Nov, 03 UTC (d1-d4)<br>Lead time: 21 hrs  | CNTRL-21h,<br>LCCN10-21h,<br>LCCN100-21h |                                          |
| 0.2 km (d5)         |                                                           | 29 Nov, 00 UTC (d1-d4)<br>1 Dec, 00 UTC (d5) | CNTRL-LES,<br>LCCN10-LES,<br>LCCN100-LES | -                                        |

**Table S1** summarizes the sensitivity experiments based on aerosol (CCN) emissions and model initialization in WRF

|                     | <b>CNTRL<br/>-27h</b> | <b>LCCN10<br/>-27h</b> | <b>LCCN100<br/>-27h</b> | <b>CNTRL<br/>-24h</b> | <b>LCCN10<br/>-24h</b> | <b>LCCN100<br/>-24h</b> |
|---------------------|-----------------------|------------------------|-------------------------|-----------------------|------------------------|-------------------------|
| Bias                | -98.65                | -82.14                 | -74.44                  | -81.12                | -63.36                 | -59.34                  |
| % change<br>DEF-27h | -                     | 16.74                  | 24.54                   | NA                    | NA                     | NA                      |
| % change<br>DEF-24h | NA                    | NA                     | NA                      | -                     | 21.90                  | 26.80                   |
| % change<br>27h-24h | -                     | -                      | -                       | 17.35                 | 23.17                  | 20.27                   |

**Table S2** presents the spatial bias (mm) in accumulated rainfall over domain d4 for lead times of 27 hours (CNTRL-27h, LCCN10-27h, and LCCN100-27h) and 24 hours (CNTRL-24h, LCCN10-24h, and LCCN100-24h), evaluated against IMERG observations after spatial regridding. The table also reports the percentage improvement of each sensitivity experiment relative to the respective baseline (CNTRL) configuration at both 27-hour and 24-hour lead times. In addition, the final row quantifies the improvement of each experiment when lead time is reduced from 27 hours to 24 hours

| Period                          | Date                 | Location       | Precipitation | Surface CCN<br>(Daily Mean Conc) |
|---------------------------------|----------------------|----------------|---------------|----------------------------------|
| Low Rainfall                    | 26 <sup>th</sup> Nov | 80.0°E, 13.0°N | 1.550 mm      | $3.67 \times 10^9$ (#/kg)        |
|                                 |                      | 80.0°E, 13.5°N | 0.638 mm      | $5.82 \times 10^9$ (#/kg)        |
|                                 | 27 <sup>th</sup> Nov | 80.0°E, 13.0°N | 1.471 mm      | $5.29 \times 10^9$ (#/kg)        |
|                                 |                      | 80.0°E, 13.5°N | 0.586 mm      | $5.69 \times 10^9$ (#/kg)        |
|                                 | 28 <sup>th</sup> Nov | 80.0°E, 13.0°N | 6.14 mm       | $5.22 \times 10^9$ (#/kg)        |
|                                 |                      | 80.0°E, 13.5°N | 4.64 mm       | $5.61 \times 10^9$ (#/kg)        |
| Moderate to<br>Extreme Rainfall | 29 <sup>th</sup> Nov | 80.0°E, 13.0°N | 36.609 mm     | $2.20 \times 10^9$ (#/kg)        |
|                                 |                      | 80.0°E, 13.5°N | 42.782 mm     | $2.89 \times 10^9$ (#/kg)        |
|                                 | 30 <sup>th</sup> Nov | 80.0°E, 13.0°N | 55.985 mm     | $2.94 \times 10^9$ (#/kg)        |
|                                 |                      | 80.0°E, 13.5°N | 45.782 mm     | $3.87 \times 10^9$ (#/kg)        |
|                                 | 1 <sup>st</sup> Dec  | 80.0°E, 13.0°N | 139.874 mm    | $9.09 \times 10^8$ (#/kg)        |
|                                 |                      | 80.0°E, 13.5°N | 116.170 mm    | $1.03 \times 10^9$ (#/kg)        |
|                                 | 2 <sup>nd</sup> Dec  | 80.0°E, 13.0°N | 37.203 mm     | $2.14 \times 10^9$ (#/kg)        |
|                                 |                      | 80.0°E, 13.5°N | 32.684 mm     | $2.51 \times 10^9$ (#/kg)        |
|                                 | 3 <sup>rd</sup> Dec  | 80.0°E, 13.0°N | 21.906 mm     | $4.07 \times 10^9$ (#/kg)        |
|                                 |                      | 80.0°E, 13.5°N | 13.883 mm     | $5.19 \times 10^9$ (#/kg)        |

**Table S3** shows daily precipitation data and daily mean surface CCN concentrations from MERRA2, comparing the two periods of rainfall at two locations in and around Chennai during the pre-analysis study

| <b>Aerosol type</b>        | <b>Effective radius<br/>r[<math>\mu\text{m}</math>]</b> | <b>Density<br/>(<math>\text{gm}^{-3}</math>)</b> |
|----------------------------|---------------------------------------------------------|--------------------------------------------------|
| Hydrophilic BC             | 0.036                                                   | 1000                                             |
| Hydrophilic OC             | 0.087                                                   | 1800                                             |
| Sea Salt (Bin 2)           | 0.3                                                     | 2200                                             |
| Sea Salt (Bin 3)           | 1.0                                                     | 2200                                             |
| Sea Salt (Bin 3)           | 3.25                                                    | 2200                                             |
| Sea Salt (Bin 4)           | 7.5                                                     | 2200                                             |
| Sulfate (SO <sub>4</sub> ) | 0.242                                                   | 1700                                             |

**Table S4** shows water-friendly aerosol components in GOCART with effective radius and density at 550 nm (Lu et al., 2022)

### S3 Supplementary Methods

#### S3.1 Moisture Patch Identification and analysis of Cold Pool dynamics

The cold pool extent is calculated from Eq. (S1) from 56 m ( $z_1$ ) to 540 m ( $z_2$ ), where the change in equivalent potential temperature ( $\Delta\theta_e$ ) is less than 2K (Schlemmer and Hohenegger, 2014).

$$\Delta\theta_e(x, y) = \frac{1}{z_2 - z_1} \left[ \int_{z_1}^{z_2} \theta_e(x, y, z) dz - \int_{z_1}^{z_2} \overline{\theta_e(x, y, z)} dz \right] \quad (S1)$$

where  $x$ ,  $y$ , and  $z$  denote the horizontal, meridional, and vertical direction.

The intensity of the cold pool ( $ci$ ) is calculated from the cold pool extent shown in Eq. (S2).

$$ci = \sqrt{(z_2 - z_1)} g \frac{-\Delta\theta_e}{\theta_{e,surface}} \quad (S2)$$

where  $g$  is the acceleration due to gravity and  $\theta_{e,surface}$  is equivalent potential temperature at the surface. The spatial extent of the moisture patch is calculated similarly from Eq. (S1), where a change in water vapor content ( $\Delta q_v$ ) exceeds  $0.5 \text{ g kg}^{-1}$  (Schlemmer and Hohenegger, 2014).

#### S3.2 Surface emissions estimation from MERRA2

Surface-level aerosol concentrations are estimated using MERRA2 mixing ratios ( $\text{kg kg}^{-1}$ ) and size distribution parameters. The GOCART model includes the following water-friendly aerosol types: hydrophilic black carbon (BC), hydrophilic organic carbon (OC), four bins of sea salt, and sulfates (Table S4).

$$\begin{aligned} \text{Concentrations of BC (\#kg}^{-1}\text{)} &= (\text{BC Aerosol Mixing Ratio}) \div (4/3 \times \pi \times (0.036 \times 10^{-6})^3) \times 1000 \\ \text{Concentrations of OC (\#kg}^{-1}\text{)} &= (\text{OC Aerosol Mixing Ratio}) \div (4/3 \times \pi \times (0.087 \times 10^{-6})^3) \times 1800 \\ \text{Concentrations of SS1 (\#kg}^{-1}\text{)} &= (\text{SS1 Aerosol Mixing Ratio}) \div (4/3 \times \pi \times (0.3 \times 10^{-6})^3) \times 2200 \\ \text{Concentrations of SS2 (\#kg}^{-1}\text{)} &= (\text{SS2 Aerosol Mixing Ratio}) \div (4/3 \times \pi \times (1.0 \times 10^{-6})^3) \times 2200 \\ \text{Concentrations of SS3 (\#kg}^{-1}\text{)} &= (\text{SS3 Aerosol Mixing Ratio}) \div (4/3 \times \pi \times (3.25 \times 10^{-6})^3) \times 2200 \\ \text{Concentrations of SS4 (\#kg}^{-1}\text{)} &= (\text{SS4 Aerosol Mixing Ratio}) \div (4/3 \times \pi \times (7.5 \times 10^{-6})^3) \times 2200 \\ \text{Concentrations of SO4 (\#kg}^{-1}\text{)} &= (\text{SO4 Aerosol Mixing Ratio}) \div (4/3 \times \pi \times (0.242 \times 10^{-6})^3) \times 1700 \end{aligned} \quad (S3)$$

$$\text{Total Concentrations (\#kg}^{-1}\text{)} = \text{BC (\#kg}^{-1}\text{)} + \text{OC (\#kg}^{-1}\text{)} + \text{SS1 (\#kg}^{-1}\text{)} + \text{SS2 (\#kg}^{-1}\text{)} + \text{SS3 (\#kg}^{-1}\text{)} + \text{SS4 (\#kg}^{-1}\text{)} + \text{SO4 (\#kg}^{-1}\text{)} \quad (S4)$$

The surface emissions are calculated based on Thompson and Eidhammer, 2014 based on the concentrations at lower levels.

### *Supplementary References*

1. Lu, C. H., Liu, Q., Wei, S. W., Johnson, B. T., Dang, C., Stegmann, P. G., Grogan, D., Ge, G., Hu, M., and Lueken, M.: The Aerosol Module in the Community Radiative Transfer Model (v2. 2 and v2. 3): accounting for aerosol transmittance effects on the radiance observation operator, *Geosci. Model Dev.*, 15, 1317-1329, <https://doi.org/10.5194/gmd-15-1317-2022>, 2022.
2. Schlemmer, L. and Hohenegger, C.: The formation of wider and deeper clouds as a result of cold-pool dynamics, *J. Atmos. Sci.*, 71, 2842-2858, <https://doi.org/10.1175/JAS-D-13-0170.1>, 2014.
3. Thompson, G. and Eidhammer, T.: A study of aerosol impacts on clouds and precipitation development in a large winter cyclone, *J. Atmos. Sci.*, 71, 3636-3658, <https://doi.org/10.1175/JAS-D-13-0305.1>, 2014.
